# Supplementary material for: Malachite Green Removal by Grape Stalks Biosorption from Natural Waters and Effluents
Source: Hindawi journal article supplement (doi:10.1155/2023/6695937), 2023-01-01
Supplement: f1 [file 6695937.f1.doc]

**Malachite green removal by grape stalks biosorption from natural waters and effluents**

ELIANA S. LEMOS1, EMILIANO F. FIORENTINI1, ADRIÁN BONILLA-PETRICIOLET2, LETICIA B. ESCUDERO1,*

1Laboratory of Environmental Biotechnology (BioTA), Interdisciplinary Institute of Basic Sciences (ICB), UNCUYO – CONICET, Faculty of Natural and Exact Sciences, National University of Cuyo. Padre Contreras 1300, (5500) Mendoza, Argentina.

2Chemical Engineering Department, Instituto Tecnológico de Aguascalientes, Aguascalientes, 20256, México.

*Corresponding author: Leticia B. Escudero.

E–mail address: [letibelescudero@gmail.com](mailto:letibelescudero@gmail.com); [lescudero@mendoza-conicet.gob.ar](mailto:lescudero@mendoza-conicet.gob.ar)

ORCID Number: 0000−0001−6671−8160

Pseudo–ﬁrst order (PFO) (Eq. (1)) and pseudo–second order (PSO) (Eq. (2)) kinetic equations:

(1)

(2)

where *k1* (min-1) and *k2* (g mg-1 min-1) are the pseudo-first and pseudo-second order rate constants, respectively; *q1* and *q2* (mg g-1) are theoretical values of adsorption capacity.

For the equilibrium studies, the results obtained were contrasted with two isotherm models: Langmuir and Freundlich. The Langmuir isotherm model was obtained using Eq. (3):

(3)

where *qm* (mg g-1) is the maximum adsorption capacity, *kL* (L g-1) is the Langmuir constant and *Ce* is the adsorbate concentration at equilibrium.

The Freundlich isotherm model Eq. (5):

(4)

where *qe* is the contaminant amount adsorbed at equilibrium time, *kF* (mg g-1) (mg L-1)–1/nFis Freundlich constant, *Ce* is the equilibrium adsorbate concentration in solution, and *1/nF* is the heterogeneity factor.
