# Supplementary material for: Malachite Green Removal by Grape Stalks Biosorption from Natural Waters and Effluents
Source: Hindawi journal article supplement (doi:10.1155/2023/6695937), 2023-01-01
Supplement: f2 [file 6695937.f2.doc]

**Malachite green removal by grape stalks biosorption from natural waters and effluents**

ELIANA S. LEMOS1, EMILIANO F. FIORENTINI1, ADRIÁN BONILLA-PETRICIOLET2, LETICIA B. ESCUDERO1,*

1Laboratory of Environmental Biotechnology (BioTA), Interdisciplinary Institute of Basic Sciences (ICB), UNCUYO – CONICET, Faculty of Natural and Exact Sciences, National University of Cuyo. Padre Contreras 1300, (5500) Mendoza, Argentina.

2Chemical Engineering Department, Instituto Tecnológico de Aguascalientes, Aguascalientes, 20256, México.

*Corresponding author: Leticia B. Escudero.

E–mail address: [letibelescudero@gmail.com](mailto:letibelescudero@gmail.com); [lescudero@mendoza-conicet.gob.ar](mailto:lescudero@mendoza-conicet.gob.ar)

ORCID Number: 0000−0001−6671−8160

The thermodynamic parameters selected in this work were the Gibbs free energy change (ΔG°, kJ mol-1) that allows defining the spontaneity of a system; enthalpy change (ΔH°¸ kJ mol-1) measures whether the biosorption process is endothermic or exothermic; and the entropy change (ΔS°, kJ mol-1) that measures the increase or decrease of the state of organization of the system with biosorption. These parameters were obtained according to Eq. (1), (2) and (3):

(1)

(2)

(3)

where *Ke*is the equilibrium constant of the selected equilibrium model, *T* (K) is the temperature, *R* (8.31x10-3 kJ mol-1 K-1) is the universal gas constant, and *ρ* is the density of the solution (g L-1).
