# Supplementary material for: Malachite Green Removal by Grape Stalks Biosorption from Natural Waters and Effluents
Source: Hindawi journal article supplement (doi:10.1155/2023/6695937), 2023-01-01
Supplement: f4 [file 6695937.f4.doc]

**Malachite green removal by grape stalks biosorption from natural waters and effluents**

ELIANA S. LEMOS1, EMILIANO F. FIORENTINI1, ADRIÁN BONILLA-PETRICIOLET2, LETICIA B. ESCUDERO1,*

1Laboratory of Environmental Biotechnology (BioTA), Interdisciplinary Institute of Basic Sciences (ICB), UNCUYO – CONICET, Faculty of Natural and Exact Sciences, National University of Cuyo. Padre Contreras 1300, (5500) Mendoza, Argentina.

2Chemical Engineering Department, Instituto Tecnológico de Aguascalientes, Aguascalientes, 20256, México.

*Corresponding author: Leticia B. Escudero.

E–mail address: [letibelescudero@gmail.com](mailto:letibelescudero@gmail.com); [lescudero@mendoza-conicet.gob.ar](mailto:lescudero@mendoza-conicet.gob.ar)

ORCID Number: 0000−0001−6671−8160

**Suplemmentary Figure 1. Pareto diagrams of the removal of malachite green (a) and biosorption capacity (b).**

**
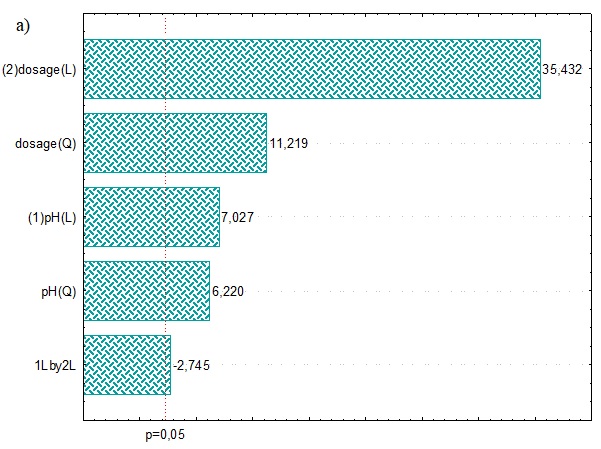
**

**
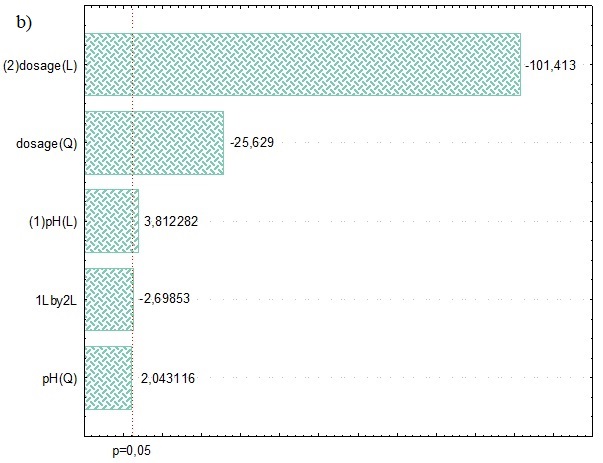
**
